# Supplementary material for: Acute Simian Immunodeficiency Virus Infection Triggers Early and Transient Interleukin-7 Production in the Gut, Leading to Enhanced Local Chemokine Expression and Intestinal Immune Cell Homing
Source: PubMed Central journal article supplement (PMC5437214; doi:10.3389/fimmu.2017.00588), 2017-05-19
Supplement: data_sheet_1.pdf [file data_sheet_1.pdf]

## *Supplementary Material*

# **Acute SIV infection triggers early and transient IL-7 production in the gut leading to enhanced local chemokine expression and intestinal immune cell homing**

Rosalie PONTE<sup>1,2,3</sup>, Magali RANCEZ<sup>1,2,3,#</sup>, Suzanne FIGUEIREDO-MORGADO<sup>1,2,3,#</sup>, Jacques DUTRIEUX<sup>1,2,3</sup>, Véronique FABRE-MERSEMAN<sup>1,2,3</sup>, Bénédicte CHARMETEAU-DE MUYLDER<sup>1,2,3</sup>, Thomas GUILBERT<sup>1,2,3</sup>, Jean-Pierre ROUTY<sup>4</sup>, Rémi CHEYNIER<sup>1,2,3,\*</sup> and Anne COUÉDEL-COURTEILLE<sup>1,2,3,5</sup>

\* **Correspondence:** Rémi Cheynier, email: [remi.cheynier@inserm.fr](mailto:remi.cheynier@inserm.fr)

## 1 Supplementary Figures and Tables

### 1.1 Supplementary Figures

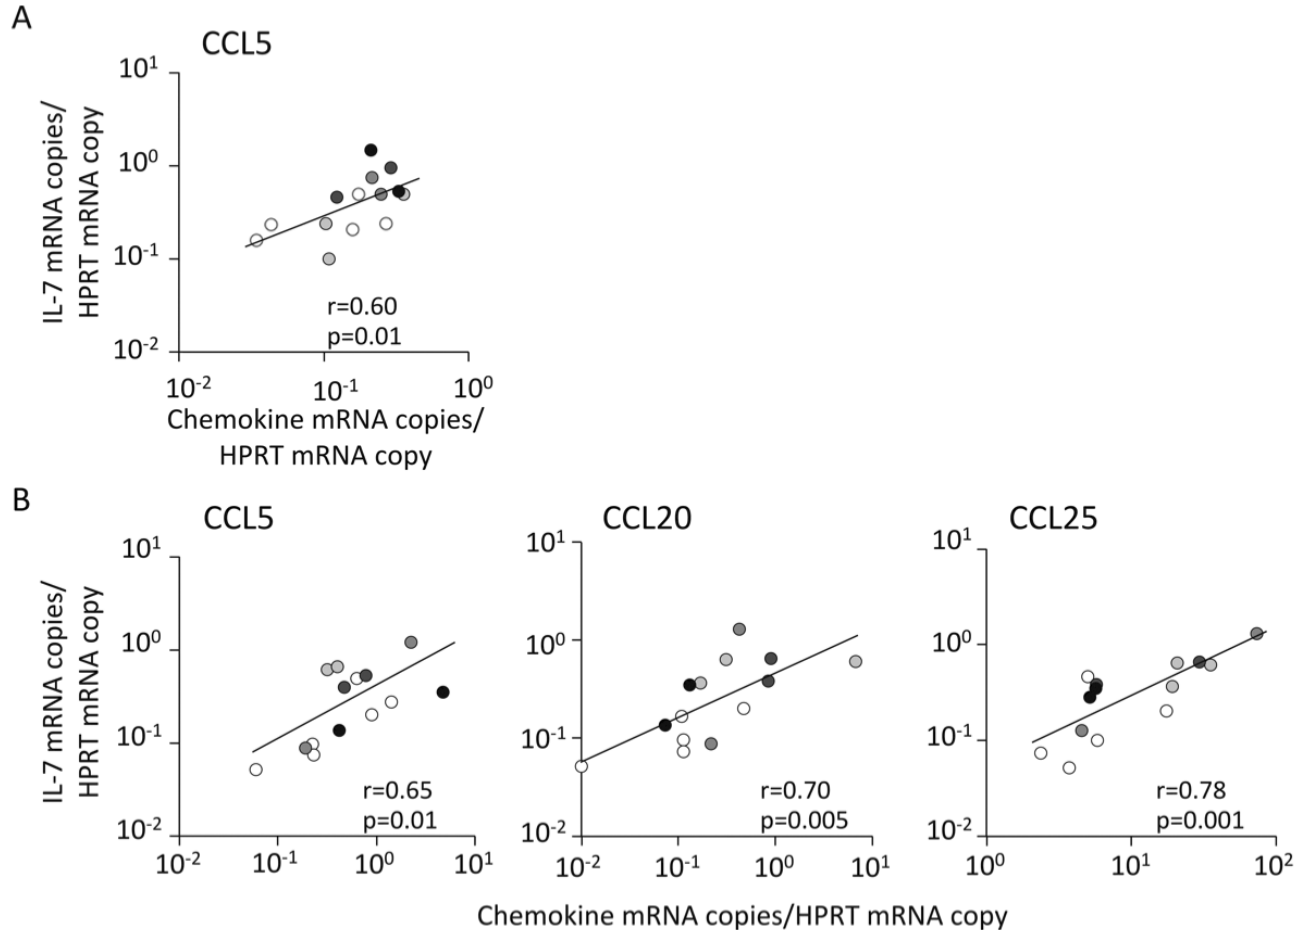

**Supplementary Figure 1. Correlations between IL-7 and chemokine mRNA expressions in the duodenum (A) and the jejunum (B) of SIV-infected macaques (0 to 10 days post-SIV infection).**

Each point represents one macaque. White circles represent uninfected controls; light grey, medium grey, dark grey and black circles represent infected macaques sampled at day 3, 7, 10 or 14, respectively. The regression lines, the Spearman's rank correlation value and the associated probability are shown for each chemokine.

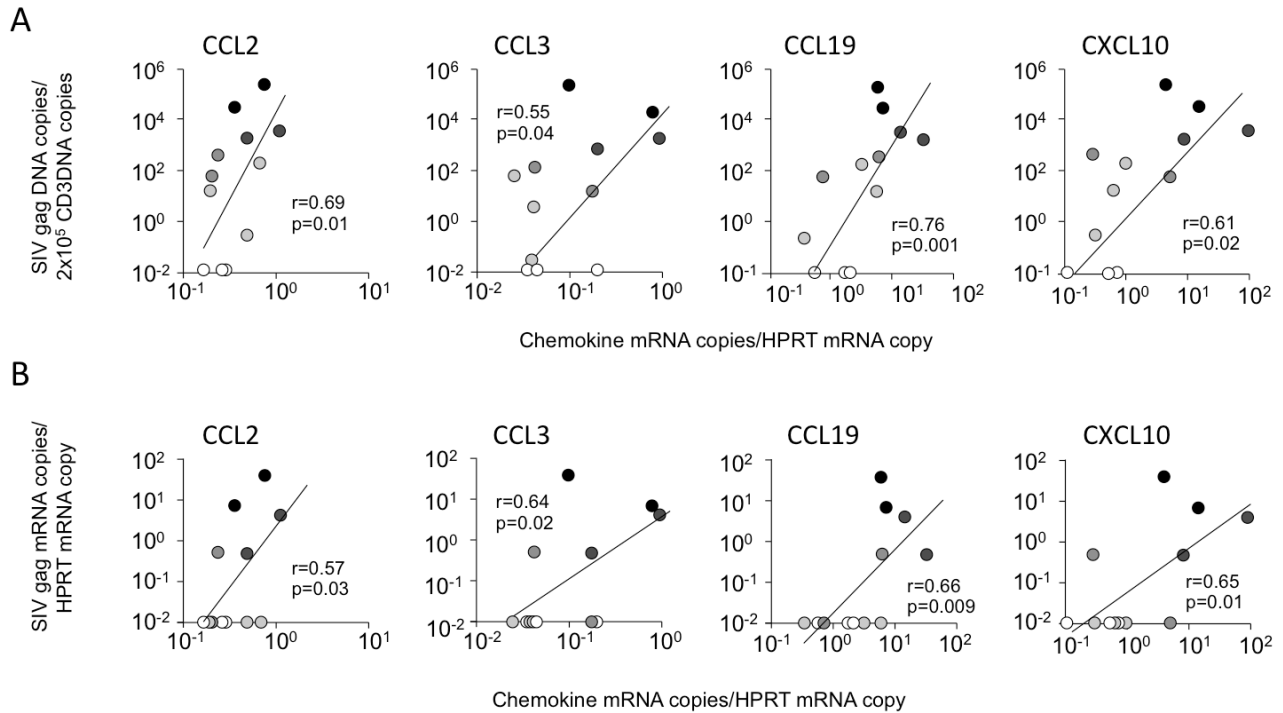

**Supplementary Figure 2. Correlation between viral load and chemokine expression in the ileum of SIV-infected rhesus macaques.**

SIV DNA load (SIV gag DNA/ $10^5$  cells), Viral load (SIV gag mRNA copies/HPRT mRNA copy) and CCL2, CCL3, CCL19, CXCL10 chemokine expression (chemokine mRNA copies/HPRT mRNA copy) were quantified in the ileum of SIV-infected macaques (day 3 to day 10 pi). (A) correlations between SIV DNA and chemokine mRNA, (B) correlations between SIV RNA and chemokine mRNA. Each point represents one individual sample. Light grey, medium grey, dark grey and black circles represent infected macaques sampled at day 3, 7, 10 or 14, respectively. The regression lines, the Spearman's rank correlation value and the associated probability are shown for each chemokine.

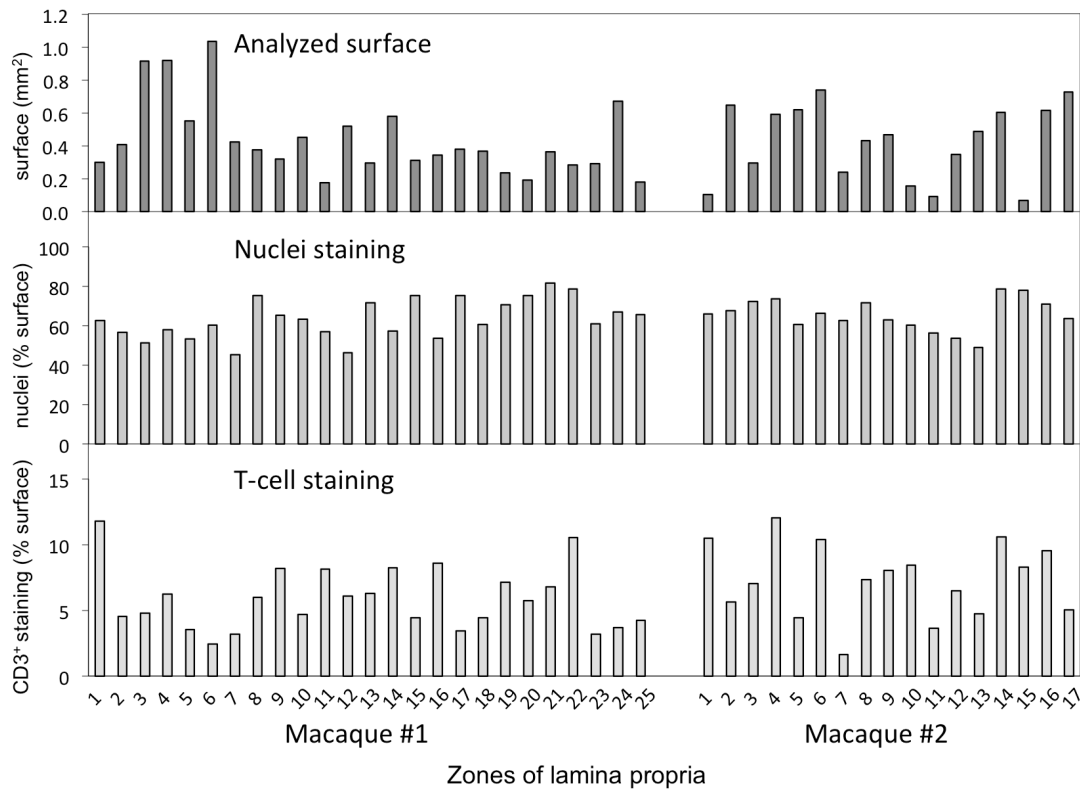

**Supplementary Figure 3. CD3 staining in the ileum of uninfected rhesus macaques.**

Ileal tissues sampled from 2 healthy macaques were labeled with DAPI (nuclei) and anti-CD3 antibody. Twenty-five and 17 different zones of the LP were defined for macaques 1 and 2, respectively. For each zone, tissue surface was measured (top panel). The proportions of LP surfaces occupied by nuclei (central panel) and by CD3<sup>+</sup> T-cells (bottom panel) were calculated for each individually analyzed zone.

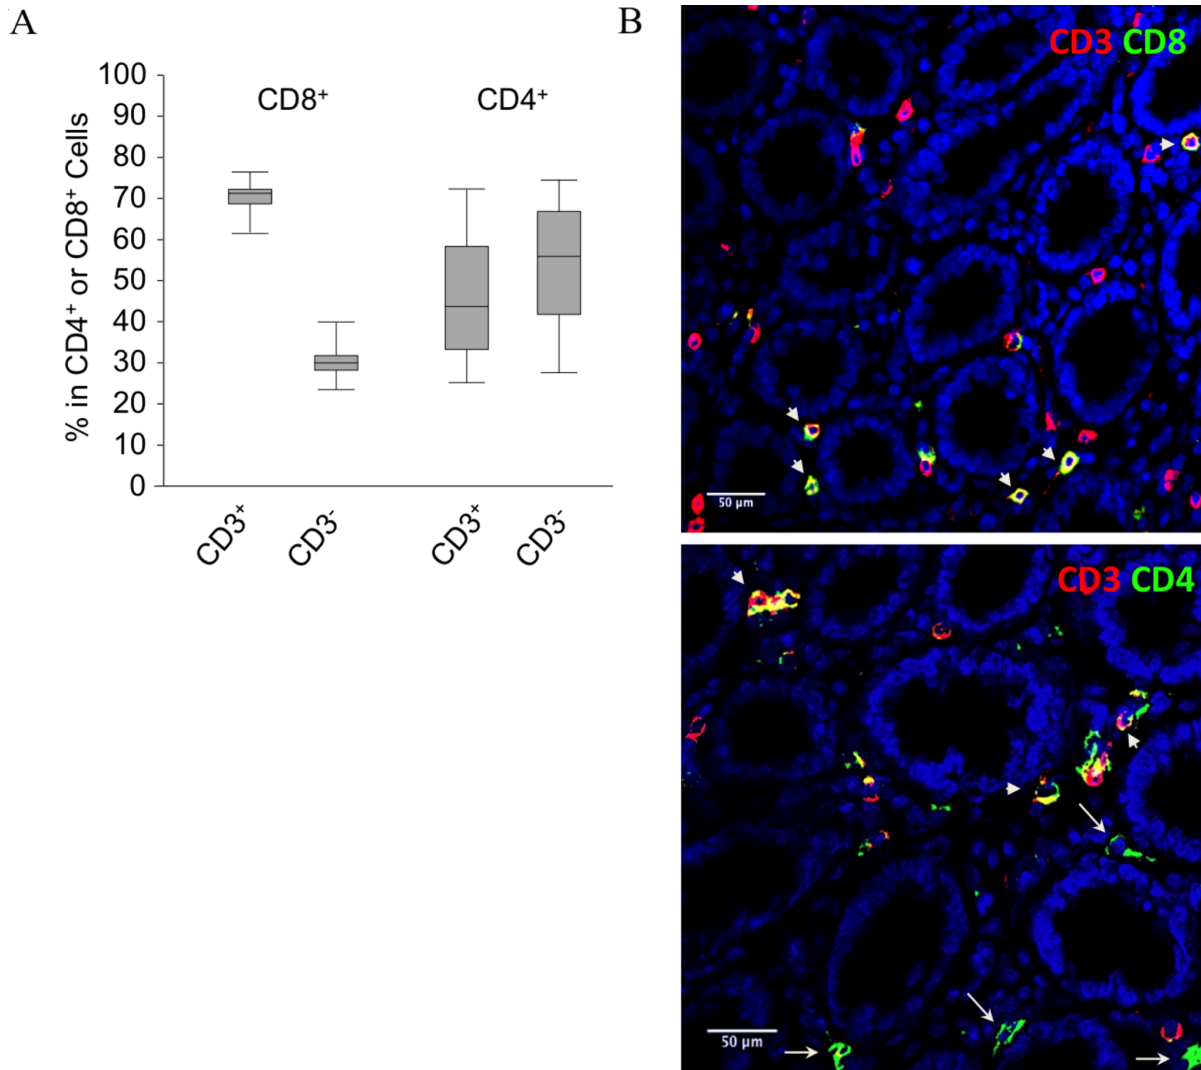

**Supplementary Figure 4. Quantifying non-T-cells in the LP of healthy rhesus macaques.**

Ileal tissues sampled from 2 healthy macaques were co-labeled with anti-CD3 antibody and with either anti-CD8 or anti-CD4 monoclonal antibodies. (A) The percentages of CD8<sup>+</sup> T-cells (CD3<sup>+</sup>CD8<sup>+</sup>) and CD8<sup>+</sup> non-T-cells (CD3<sup>-</sup>CD8<sup>+</sup>) within CD8<sup>+</sup> surfaces, as well as CD4<sup>+</sup> T-cells (CD3<sup>+</sup>CD4<sup>+</sup>) and CD4<sup>+</sup> non-T-cells (CD3<sup>-</sup>CD4<sup>+</sup>) within CD4<sup>+</sup> surfaces, were calculated for each individual LP area. (B) Representative examples of LP staining with anti-CD3 (red) and anti-CD8 (green) (top panel) and anti-CD3 (red) and anti-CD4 (green) (bottom panel). Arrows identify CD4<sup>+</sup> non-T-cells and arrowheads indicate either CD8<sup>+</sup> (top panel) or CD4<sup>+</sup> (bottom panel) T-cells.

## 1.2 Supplementary tables

Supplementary Table 1. Oligonucleotides used to amplify IL-7, chemokines and HPRT

| Name        | Sequence                | Name       | Sequence               |
|-------------|-------------------------|------------|------------------------|
| HPRT-Out5   | CTGAACGTCTTGCTCGAGAT    | HPRT-In5   | CACATTGTAGCCCTCTGTGT   |
| HPRT-Out3   | CGACCTTGACCATCTTTGGA    | HPRT-In3   | CTGACCAAGGAAAGCAAAGT   |
| CCL2-Out5   | AACATCCAGTGCTCAAAGTAA   | CCL2-In5   | CTGCTCATAGCAGCCACCTTCA |
| CCL2-Out3   | TCCAGGTGGTCCATGGAAT     | CCL2-In3   | TCCTGAACCCACTTCTGCTT   |
| CCL3-Out5   | CATTCCATCACCTGCTCAGAA   | CCL3-In5   | CAACCGGATCTCAGCAACAT   |
| CCL3-Out3   | TCCAGGTCGCTGACGTATTT    | CCL3-In3   | GCCGGCCTCTCTTGGTTA     |
| CCL4-Out5   | CCATGAAGCTGCGCGTGA      | CCL4-In5   | CCCACCTCCTGCTGCTT      |
| CCL4-Out3   | CTCAGTTCAGTTCAGGTCA     | CCL4-In3   | GCAGACTTGCTTCCCTCTTTT  |
| CCL5-Out5   | GCTGTCATCCTCGTTGCTA     | CCL5-In5   | ACATGCCTCAGACACCACA    |
| CCL5-Out3   | CTCATCTCAAAGAGTTGATGTA  | CCL5-In3   | TACTCCGAACCCATTTCTT    |
| CCL11-Out5  | TGAAGGTCTCCACAACACT     | CCL11-In5  | TGCAACCACCTGCTGCTTTA   |
| CCL11-Out3  | TGGCTTTGGAGTTGGAGAT     | CCL11-In3  | TTGGAGATTTTCGGTCCAGATA |
| CCL19-Out5  | ACCGTTGGCCTGCCTCTGTT    | CCL19-In5  | CAGCCTGCTGGTTCTCTGGA   |
| CCL19-Out3  | CTGCTGCGGCGCTTCATCTT    | CCL19-In3  | TCCTCTGCAGTCTCTGGAT    |
| CCL20-Out5  | CCATGTGCTGTACCAAGAGT    | CCL20-In5  | TTGCTCCTGGCTGCTTTGA    |
| CCL20-Out3  | TGCTGAGGCGACGTACAATA    | CCL20-In3  | CCCAGGTCTGCTTTGGATT    |
| CCL21-Out5  | CCTCAGCTCTGGCCTCTTA     | CCL21-In5  | ATGGCTCAGTCACTGGCTCT   |
| CCL21-Out3  | TCACTGGGCTATGGCCCTTTA   | CCL21-In3  | CTATGGCCCTTAGGGGTCT    |
| CCL25-Out5  | CACACCAAGGTGTCTTTGA     | CCL25-In5  | TTATCGGATCCAGGAGGTGA   |
| CCL25-Out3  | TTAGCTGATGTCAGGAGGGA    | CCL25-In3  | CTGCTGGTGGGATTGCTAAA   |
| CCL28-Out5  | AAGGCTCCTGGAAAGAGTGAA   | CCL28-In5  | TCGCATCCAGAGAGCTGAT    |
| CCL28-Out3  | GTTTCGTGTTCCCTGATGT     | CCL28-In3  | CTGATGTGCCCTGTTACTGT   |
| CXCL8-Out5  | GAACCATCTCGCTCTGTGTA    | CXCL8-In5  | ATCTCGCTCTGTGTAACATGA  |
| CXCL8-Out3  | GCTCTCTCCATCGGAAAGT     | CXCL8-In3  | CTGTATTGGCACAGTGTGGT   |
| CXCL10-Out5 | TGATTTGCTGCCTTGCTTTCT   | CXCL10-In5 | CTCTCTCAAGAACTGTACGCT  |
| CXCL10-Out3 | ACCTCTTCTACCCTTCTTTT    | CXCL10-In3 | CATGTGGACAAAATTGACTTGA |
| CXCL12-Out5 | GTCAGCCTGAGCTACAGAT     | CXCL12-In5 | TACAGATGCCATGCCGATT    |
| CXCL12-Out3 | TTTCTCCAGTACTCCTGAA     | CXCL12-In3 | TCGGGTCAATGCACACTTGT   |
| IL-7-Out5   | TTTGGACTTCTCCCTGAT      | IL-7-In5   | CCCCTGATCCTGTTCTGTT    |
| IL-7-Out3   | GTGTTCTTTAGTGCCCATCAAAT | IL-7-In3   | GCGAGCAGCACGGAATAAAA   |

**Supplementary Table 2. Oligonucleotides used to amplify SIV gag and CD3 $\gamma$  house keeping gene**

| <b>Name</b>  | <b>Sequence</b>        | <b>Name</b> | <b>Sequence</b>         |
|--------------|------------------------|-------------|-------------------------|
| CD3-Out5     | ACTGACATGGAACAGGGGAA   | CD3-In5     | GGCTATCATTCTTCTTCAAGGTA |
| CD3-Out3     | AGCTCTGAAGTAGGGAACATAT | CD3-In3     | TTCCTGGCCTATGCCCTTTT    |
| Gag-SIV-Out5 | CAACAAGGACAGCTTAGGGA   | Gag-SIV-In5 | CCGTCAGGATCAGATATTGCA   |
| Gag SIV-Out3 | TTGACAGGCCGTCAGCATTT   | Gag SIV-In3 | GAAACTATGCCAAAAACAAGT   |

**Supplementary Table 3. Antibodies used for polychromatic flow cytometry analysis**

| <b>Antibodies</b>     |                                                            |              |                 |                                |
|-----------------------|------------------------------------------------------------|--------------|-----------------|--------------------------------|
| <b>Target epitope</b> | <b>Fluorochrome-conjugated</b>                             | <b>Clone</b> | <b>Supplier</b> | <b>Supplier details</b>        |
| CD3                   | PE-Cy7 ( <i>phycoerythrin (PE)-Cy7</i> )                   | SP34-2       | BD Biosciences  | Le Pont de Claix, France       |
| CD4                   | PerCP-Cy5.5 ( <i>peridinin chlorophyll protein-Cy5.5</i> ) | L200         | BD Biosciences  | Le Pont de Claix, France       |
| CD8                   | PB ( <i>pacific blue</i> )                                 | RPA-T8       | BD Biosciences  | Le Pont de Claix, France       |
| CD28                  | PE ( <i>phycoerythrin</i> )                                | CD28.2       | BD Biosciences  | Le Pont de Claix, France       |
| CD95                  | APC ( <i>allophycocyanin</i> )                             | DX2          | BD Biosciences  | Le Pont de Claix, France       |
| CD127                 | Biotin + Streptavidin-phycoerythrin (PE)-Texas Red         | MB15-18C9    | Miltenyi        | Paris, France                  |
| Ki-67                 | FITC ( <i>fluorescein isothiocyanate</i> )                 | MIB-1        | DAKO            | Les Ulis, France               |
| β7                    | Biotin + Streptavidin-PO ( <i>pacific orange</i> )         | FIB504       | BioLegend       | St-Quentin en Yvelines, France |
| CCR6                  | FITC ( <i>fluorescein isothiocyanate</i> )                 | 53130        | R&D systems     | Lille, France                  |
| CCR9                  | FITC ( <i>fluorescein isothiocyanate</i> )                 | 112509       | R&D systems     | Lille, France                  |



**Supplementary Table 4. Antibodies used for the immunostaining of ileal sections**

**Primary antibodies**

| <b>Target epitope or cell type</b> | <b>Isotype</b> | <b>Clone</b> | <b>Supplier</b>      | <b>Supplier details</b>                    | <b>Concentration (µg/ml)</b> |
|------------------------------------|----------------|--------------|----------------------|--------------------------------------------|------------------------------|
| CD3                                | Rabbit IgG     | (polyclonal) | DAKO                 | Trappes, France                            | 2.5                          |
| CD4                                | Mouse IgG1     | L200         | BD Biosciences       | Le Pont de Claix, France                   | 5                            |
| CD4                                | Mouse IgG2b    | OKT4         | BioLegend            | St-Quentin en Yvelines, France             | 10                           |
| CD8                                | Mouse IgG1     | RPA-T8       | BD Biosciences       | Le Pont de Claix, France                   | 5                            |
| HLA-DR                             | Mouse IgG2b    | TU36         | BD Biosciences       | St-Quentin en Yvelines, France             | 0.1                          |
| Macrophages                        | Mouse IgG1     | PM-2K        | AbD Serotec          | Düsseldorf, Germany                        | 0.5                          |
| CD68                               | Mouse IgG1     | KP1          | DAKO                 | Trappes, France                            | 4                            |
| DC-SIGN                            | Mouse IgG2b    | 120507       | R&D systems          | Lille, France                              | 5                            |
| CD11c                              | Mouse IgG1     | 3.9          | BioLegend            | St-Quentin en Yvelines, France             | 5                            |
| CD169                              | Mouse IgG1     | HSn 7D2      | Abcam                | Paris, France                              | 5.5                          |
| CD86                               | Mouse IgG2b    | IT2.2        | BD Biosciences       | Le Pont de Claix, France                   | 2                            |
| CD83                               | Mouse IgG2b    | HB15A        | Beckman Coulter      | Marseille, France                          | 10                           |
| Ki-67                              | Rabbit IgG     | (polyclonal) | Merck Millipore      | Fontenay sous Bois, France                 | Not specified                |
| IL-7                               | Rabbit IgG     | (polyclonal) | Abcam                | France                                     | 4.3                          |
| CK18                               | Guinea-pig     | (polyclonal) | Abcam                | Paris, France                              | Not specified                |
| Ezrin                              | Rabbit         | (polyclonal) | Gift from P. Mangeat | Paris, France<br>CNRS, Montpellier, France | Not specified                |

**Secondary antibodies**

| <b>Target species</b>           | <b>Host species</b> | <b>Conjugate</b>           | <b>Supplier</b>  | <b>Supplier details</b> | <b>Concentration (µg/ml)</b> |
|---------------------------------|---------------------|----------------------------|------------------|-------------------------|------------------------------|
| Mouse<br>(IgG1, IgG2a or IgG2b) | Goat                | Alexa Fluor®<br>546 or 488 | Molecular Probes | Cergy Pontoise, France  | 5                            |
| Rabbit                          | Goat                | Alexa Fluor®<br>546 or 488 | Molecular Probes | Cergy Pontoise, France  | 5                            |
| Guinea pig                      | Goat                | Alexa Fluor®<br>488        | Thermo Fisher    | Villebon, France        | 5                            |

**Supplementary Table 5. Quantification of SIV RNA in tissues sampled from SIV-infected rhesus macaques.**

| SIV RNA | Mac # | Axillary LN      | Mesenteric LN | Duodenum | Jejunum | Ileum | Asc. Colon | Desc. Colon | Rectum |
|---------|-------|------------------|---------------|----------|---------|-------|------------|-------------|--------|
| Day3    | 6     | - <sup>(a)</sup> | -             | -        | -       | -     | -          | -           | -      |
|         | 7     | -                | -             | -        | -       | -     | -          | +++         | -      |
|         | 8     | +                | -             | -        | -       | -     | -          | -           | -      |
| Day7    | 9     | -                | +             | -        | +       | -     | ++         | -           | -      |
|         | 10    | -                | -             | -        | -       | -     | -          | -           | -      |
| Day10   | 11    | +                | +++           | +++      | -       | ++    | +          | ++          | ++     |
|         | 12    | ++               | +++           | ++       | -       | +++   | +          | +           | ++     |
| Day14   | 13    | ++++             | ++++          | ++++     | ++++    | ++++  | ++++       | ++++        | ++++   |
|         | 14    | +++              | +++           | +++      | ++++    | +++   | ++         | +++         | +++    |

<sup>a</sup> - : Undetectable; +:  $0 < X \leq 0.1$  copy/HPRT copy; ++:  $0.1 < X \leq 1$  copy/HPRT copy; +++:  $1 < X \leq 10$  copies/HPRT copy; ++++:  $X > 10$  copies/HPRT copy.
